# Supplementary material
Source: publisher figshare collection journal article supplement (https://acs.figshare.com/ndownloader/files/3706804)
Supplement: Supplementary file 1 [file 3706804]

## Sheet: Blad1
Compound	SMILES	Reported IC50 (nM)	Measured IC50 (nM)	cLogP	Solubility (µM)	Microsomal stability human Half-life (t1/2) (min)	Microsomal stability mouse Half-life (t1/2) (min)	Plasma stability human %recovery after 6h	Plasma stability mouse %recovery after 6h
1 (fer-1)	NC1=CC(C(OCC)=O)=CC=C1NC2CCCCC2	95	18	3.7	>200	6.9 ± 0.2	1.9 ± 0 .6	100	0
2 (SRS9-11)	NC1=CC(C(NCC)=O)=CC=C1NC2CCCCCCC2	950
3 (SRS11-92)	O=C(OCC)C1=CC=C(NC2CCCCC2)C(NCC3=CC=CC=C3)=C1	6
4 (SRS16-86)	O=C(OC(C)(C)C)C1=CC=C(NC23CC4CC(C3)CC(C4)C2)C(/N=C\C5=CN=CN=C5)=C1	350
5	ClC1=CC=C(C(O)=O)C=C1[N+]([O-])=O
6	ClC1=CC=C(C(OC)=O)C=C1[N+]([O-])=O
7	OC(C1=CC=C(NC2CCCCC2)C([N+]([O-])=O)=C1)=O
8	O=C(OC)C1=CC=C(NC2CCCCC2)C([N+]([O-])=O)=C1
9	NC1=CC(C(O)=O)=CC=C1NC2CCCCC2		210	2.6
10	NC1=CC(C(OC)=O)=CC=C1NC2CCCCC2		34	3.1
11	O=C(Cl)C1=CC=C(Cl)C([N+]([O-])=O)=C1
12	O=C(NCC)C1=CC=C(Cl)C([N+]([O-])=O)=C1
13	O=C(NCC)C1=CC=C(NC2CCCCC2)C([N+]([O-])=O)=C1
14	O=C(NCC)C1=CC=C(NC2C3CC4CC(C3)CC2C4)C([N+]([O-])=O)=C1
15	NC1=CC(C(NCC)=O)=CC=C1NC2CCCCC2		88	2.1
16	O=C(NCC)C1=CC=C(NC2C3CC4CC(C3)CC2C4)C(N)=C1		14	3.8
17	O=C(NCC)C1=CC=C(NC2CCCCC2)C(NCC3=CC=CC=C3)=C1		21	4.3
18	O=C(NCC)C1=CC=C(NC2CCCCC2)C(NCC3=CC=NC=C3)=C1		26	2.8
19	O=C(NCC)C1=CC=C(NC2C3CC4CC(C3)CC2C4)C(NCC5=CC=CC=C5)=C1		6.5	6
20	O=C(NCC)C1=CC=C(NC2C3CC4CC(C3)CC2C4)C(NCC5=CC=NC=C5)=C1		3.4	4.5	25-50	16 ± 2	30 ± 3	100	100
21	ClC1=CC=C(S(=O)(Cl)=O)C=C1[N+]([O-])=O
22	ClC1=CC=C(S(=O)(NC)=O)C=C1[N+]([O-])=O
23	ClC1=CC=C(S(=O)(NCC)=O)C=C1[N+]([O-])=O
24	ClC1=CC=C(S(=O)(NC(C)(C)C)=O)C=C1[N+]([O-])=O
25	O=S(C1=CC=C(NC2CC2)C([N+]([O-])=O)=C1)(NCC)=O
26	O=S(C1=CC=C(NC2CCCC2)C([N+]([O-])=O)=C1)(NCC)=O
27	O=S(C1=CC=C(NC2CCCCC2)C([N+]([O-])=O)=C1)(NCC)=O
28	O=S(C1=CC=C(NC2C(C3)CCC3C2)C([N+]([O-])=O)=C1)(NCC)=O
29	O=S(C1=CC=C(NC2CCCCCCC2)C([N+]([O-])=O)=C1)(NCC)=O
30	O=S(C1=CC=C(NC2C3CC4CC(C3)CC2C4)C([N+]([O-])=O)=C1)(NCC)=O
31	O=S(C1=CC=C(NC2CCCCC2)C([N+]([O-])=O)=C1)(NC)=O
32	O=S(C1=CC=C(NC2C3CC4CC(C3)CC2C4)C([N+]([O-])=O)=C1)(NC)=O
33	O=S(C1=CC=C(NC2CCCCC2)C([N+]([O-])=O)=C1)(NC(C)(C)C)=O
34	O=S(C1=CC=C(NC2C3CC4CC(C3)CC2C4)C([N+]([O-])=O)=C1)(NC(C)(C)C)=O
35	O=S(C1=CC=C(NC2CC2)C(N)=C1)(NCC)=O		76	0.8
36	O=S(C1=CC=C(NC2CCCC2)C(N)=C1)(NCC)=O		82	1.2
37	O=S(C1=CC=C(NC2CCCCC2)C(N)=C1)(NCC)=O		67	2.2	12.5-25	37 ± 3	31 ± 5	81.9	86.2
38	O=S(C1=CC=C(NC2C(C3)CCC3C2)C(N)=C1)(NCC)=O		28	2.5
39	O=S(C1=CC=C(NC2CCCCCCC2)C(N)=C1)(NCC)=O		9.3	3.4
40	O=S(C1=CC=C(NC2C3CC4CC(C3)CC2C4)C(N)=C1)(NCC)=O		17	3.9
41	O=S(C1=CC=C(NC2CCCCC2)C(N)=C1)(NC)=O		76	1.7
42	O=S(C1=CC=C(NC2C3CC4CC2CC(C4)C3)C(N)=C1)(NC)=O		11	3.4
43	O=S(C1=CC=C(NC2CCCCC2)C(N)=C1)(NC(C)(C)C)=O		27	2.9
44	O=S(C1=CC=C(NC2C3CC4CC2CC(C4)C3)C(N)=C1)(NC(C)(C)C)=O		6	4.6
45	O=S(C1=CC=C(NC2CC2)C(NCC3=CC=CC=C3)=C1)(NCC)=O		61	3.9
46	O=S(C1=CC=C(NC2CC2)C(NCC3=CC=NC=C3)=C1)(NCC)=O		128	1.5
47	O=S(C1=CC=C(NC2CCCC2)C(NCC3=CC=CC=C3)=C1)(NCC)=O		8.2	3.9
48	O=S(C1=CC=C(NC2CCCC2)C(NCC3=CC=NC=C3)=C1)(NCC)=O		36	2.4
49	O=S(C1=CC=C(NC2CCCCC2)C(NCC3=CC=CC=C3)=C1)(NCC)=O		4	4.4	12.5-25	88 ± 16	187 ± 41	100	98.6
50	O=S(C1=CC=C(NC2CCCCC2)C(NCC3=CC=NC=C3)=C1)(NCC)=O		23	2.9
51	O=S(C1=CC=C(NC2C(C3)CCC3C2)C(NCC4=CC=CC=C4)=C1)(NCC)=O		3	4.7
52	O=S(C1=CC=C(NC2C(C3)CCC3C2)C(NCC4=CC=NC=C4)=C1)(NCC)=O		9.4	3.2
53	O=S(C1=CC=C(NC2CCCCCCC2)C(NCC3=CC=CC=C3)=C1)(NCC)=O		2.4	5.5
54	O=S(C1=CC=C(NC2CCCCCCC2)C(NCC3=CC=NC=C3)=C1)(NCC)=O		22	4
55	O=S(C1=CC=C(NC2C3CC4CC(C3)CC2C4)C(NCC5=CC=CC=C5)=C1)(NCC)=O		3.5	6.1	12.5-25	36 ± 11	31 ± 6	100	99.4
56	O=S(C1=CC=C(NC2C3CC4CC(C3)CC2C4)C(NCC5=CC=NC=C5)=C1)(NCC)=O		3.9	4.6	12.5-25	64 ± 10	26 ± 5	100	100
57	O=S(C1=CC=C(NC2CCCCC2)C(NCC3=CC=CC=C3)=C1)(NC)=O		3.7	3.9
58	O=S(C1=CC=C(NC2CCCCC2)C(NCC3=CC=NC=C3)=C1)(NC)=O		15	2.4
59	O=S(C1=CC=C(NC2C3CC4CC(C3)CC2C4)C(NCC5=CC=CC=C5)=C1)(NC)=O		4.9	5.6
60	O=S(C1=CC=C(NC2C3CC4CC(C3)CC2C4)C(NCC5=CC=NC=C5)=C1)(NC)=O		6.4	4.1
61	O=S(C1=CC=C(NC2CCCCC2)C(NCC3=CC=CC=C3)=C1)(NC(C)(C)C)=O		6.2	5.1
62	O=S(C1=CC=C(NC2CCCCC2)C(NCC3=CC=NC=C3)=C1)(NC(C)(C)C)=O		11	3.6
63	O=S(C1=CC=C(NC2C3CC4CC(C3)CC2C4)C(NCC5=CC=CC=C5)=C1)(NC(C)(C)C)=O		3.4	6.8
64	O=S(C1=CC=C(NC2C3CC4CC(C3)CC2C4)C(NCC5=CC=NC=C5)=C1)(NC(C)(C)C)=O		5.2	5.3
